# Supplementary material
Source: PubMed Central journal article supplement (PMC7963761)
Supplement: 16-00094.pdf [file 16-00094.pdf]

**On-line Table: Voxel-based statistical results between presbycusis and control groups<sup>a</sup>**

|                             | DA                                       |                                                                         |                                        | DR                                     |                                                                            |           | FA                                       |                                                                            |           | MD                                       |                                          |           |
|-----------------------------|------------------------------------------|-------------------------------------------------------------------------|----------------------------------------|----------------------------------------|----------------------------------------------------------------------------|-----------|------------------------------------------|----------------------------------------------------------------------------|-----------|------------------------------------------|------------------------------------------|-----------|
|                             | Cluster 1                                | Cluster 2                                                               | Cluster 3                              | Cluster 1                              | Cluster 2                                                                  | Cluster 3 | Cluster 1                                | Cluster 2                                                                  | Cluster 3 | Cluster 1                                | Cluster 2                                | Cluster 3 |
| Peak intensity (T)          | 5.6463                                   | 5.1246                                                                  | 4.7139                                 | 4.9652                                 | 5.4709                                                                     | 4.7139    | 5.9283                                   | 5.4709                                                                     | 4.7139    | 5.9283                                   | 5.4709                                   | 4.7139    |
| Cluster-level P value       | <.001                                    | .017                                                                    | .014                                   | .014                                   | <.001                                                                      | .019      | <.001                                    | <.001                                                                      | .019      | <.001                                    | <.001                                    | .019      |
| Peak MNI coordinate (X Y Z) | 38 -24 2                                 | -34 26 -4                                                               | 40 -10 -14                             | 40 -10 -14                             | 16 40 6                                                                    | 32 -50 20 | 38 -24 2                                 | 16 40 6                                                                    | 32 -50 20 | 38 -24 2                                 | 38 -24 2                                 | 32 -50 20 |
| Overlap areas               | Temporal_Sup_R,<br>Insula_R,<br>Heschl_R | Temporal_Sup_R,<br>Frontal_Inf_Orb_L,<br>Frontal_Inf_Tri_L,<br>Insula_L | Temporal_Pole_Sup_R,<br>Temporal_Mid_R | Temporal_Pole_Sup_R,<br>Temporal_Mid_R | Frontal_Inf_Orb_R,<br>Frontal_Inf_Orb_L,<br>Frontal_Inf_Tri_L,<br>Insula_L | Angular_R | Temporal_Sup_R,<br>Insula_R,<br>Heschl_R | Frontal_Inf_Orb_R,<br>Frontal_Inf_Orb_L,<br>Frontal_Inf_Tri_L,<br>Insula_L | Angular_R | Temporal_Sup_R,<br>Insula_R,<br>Heschl_R | Temporal_Sup_R,<br>Insula_R,<br>Heschl_R | Angular_R |

**Note:**—MNI indicates Montreal Neurological Institute; Temporal\_Sup\_R, right superior temporal gyrus; Insula\_R, right insula; Heschl\_R, right heschl gyrus; Frontal\_Inf\_Orb\_L, left inferior frontal gyrus, orbital part; Frontal\_Inf\_Tri\_L, left inferior frontal gyrus, triangular part; Insula\_L, left insula; Temporal\_Pole\_Sup\_R, right superior temporal pole; Temporal\_Mid\_R, right middle temporal gyrus; Frontal\_Inf\_Orb\_R, right inferior frontal gyrus, orbital part; Angular\_R, right angular gyrus.

<sup>a</sup>Each labeled cluster with respect to DA/DR/FA/MD denotes the group of voxels that show significant between-group difference of DA/DR/FA/MD, respectively.
